# Supplementary material for: Surface-modified spinel high entropy oxide with hybrid coating-layer for enhanced cycle stability and lithium-ion storage performance
Source: Royal Society of Chemistry journal article supplement (doi:10.1039/d4ra06878e), 2024-01-01
Supplement: d4ra06878e1.pdf [file d4ra06878e1.pdf]

## Supporting information

### Surface-Modified Spinel High Entropy Oxide with Hybrid Coating-layer for Enhanced Cycle Stability and Lithium-ion Storage Performance

Feiyue Zhai,<sup>abc</sup> Shengji Gao,<sup>bcd</sup> Wenfeng Zhang,<sup>bc</sup> Gaoping Cao,<sup>bc</sup> Huimin Zhang,<sup>bc</sup>  
Yalan Xing,<sup>a</sup> Yu Xiang<sup>bc\*</sup> and Shichao Zhang<sup>a</sup>

- a. School of Materials Science and Engineering, Beihang University, Beijing 100191, China.*
- b. Chemical Defense Institute, Beijing, 100191, PR China.*
- c. Beijing Key Laboratory of Advanced Chemical Energy Storage Technology and Materials, Beijing 100191, China.*
- d. Hebei University of Technology, Tianjin 100131, China*

\* Corresponding author: E-mail address: drxiangyu2016@126.com (Yu Xiang)

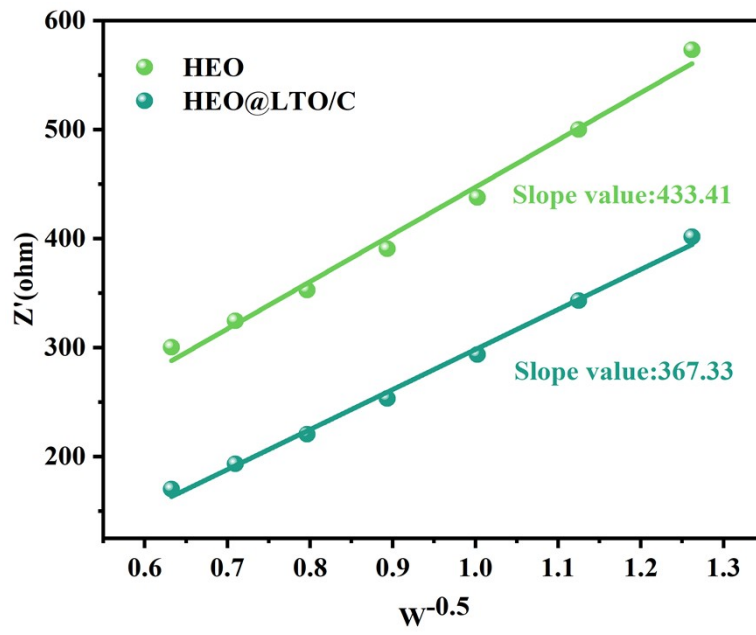

Fig. S1 plots of  $Z'$  versus  $\omega^{-0.5}$  from EIS data
